# Supplementary material for: Ag/YBCO superconducting round wires fabricated by bimaterial 3D printing
Source: Research Square preprint supplement (doi:10.21203/rs.3.rs-7301425/v1), 2025-08-21
Supplement: Supplementary file 2 [file 859159f6ec68c0e6e9fc5674.xlsx]

## Sheet: Sheet1
Y2BaCuO5 (PDF Card - 01-079-0238)
2θ	d(Å)	I	h	k	l
14.3785	6.15501	45	1	1	0
14.5372	6.08815	6	0	2	0
19.1496	4.63089	6	1	2	0
20.0113	4.43339	2	1	0	1
21.311	4.16585	11	1	1	1
21.4198	4.14494	12	0	2	1
24.8229	3.58386	18	1	2	1
24.9439	3.56675	12	2	0	0
25.2244	3.52772	1	1	3	0
26.01	3.42292	51	2	1	0
28.9897	3.07751	70	2	2	0
29.3152	3.04408	51	0	4	0
29.82	2.99368	999	1	3	1
30.4962	2.92883	840	2	1	1
31.5942	2.8295	471	0	0	2
31.9382	2.79981	212	1	4	0
33.107	2.70358	129	2	2	1
33.3962	2.68083	10m	0	4	1
33.3962	2.68083	m	2	3	0
34.8695	2.57086	47m	1	1	2
34.8695	2.57086	m	0	2	2
35.751	2.50947	124	1	4	1
37.0954	2.42155	85	2	3	1
37.2081	2.41447	55	1	2	2
38.545	2.33375	42	3	1	0
38.862	2.31544	12	2	4	0
39.0511	2.30466	89	1	5	0
40.7024	2.21489	177m	2	0	2
40.7024	2.21489	m	3	2	0
40.8499	2.20723	101	1	3	2
41.1432	2.19217	20	3	0	1
41.3665	2.18085	77	2	1	2
41.8353	2.15749	56	3	1	1
42.1316	2.143	6	2	4	1
42.3087	2.13444	40	1	5	1
43.4073	2.08293	43	2	2	2
43.6376	2.07247	63	0	4	2
43.8585	2.06254	47	3	2	1
44.6134	2.02938	74	0	6	0
45.0389	2.01119	4	2	5	0
45.5409	1.99018	305	1	4	2
46.4852	1.95193	9	1	6	0
46.6488	1.94546	67	2	3	2
47.0755	1.92882	26	3	3	1
47.5607	1.91027	6	0	6	1
47.966	1.89507	25	2	5	1
48.5425	1.8739	73	3	4	0
49.346	1.84525	16	1	6	1
49.9703	1.82365	1	1	0	3
50.6615	1.80038	5m	0	2	3
50.6615	1.80038	m	3	1	2
51.0704	1.78692	69	1	5	2
51.1791	1.78338	65	4	0	0
51.3174	1.7789	41	3	4	1
51.7872	1.76386	49m	4	1	0
51.7872	1.76386	m	2	6	0
52.4186	1.74409	124	3	2	2
53.4966	1.71146	1	4	2	0
53.8411	1.70132	1	3	5	0
54.2329	1.68995	15	1	7	0
54.4207	1.68456	55m	2	6	1
54.4207	1.68456	m	4	1	1
55.1694	1.66346	132	1	3	3
55.5825	1.65207	122	2	1	3
55.692	1.64908	79	0	6	2
56.0951	1.63818	11m	2	5	2
56.0951	1.63818	m	4	2	1
56.2995	1.63272	8	4	3	0
56.429	1.62928	5	3	5	1
56.8086	1.61929	26	1	7	1
57.234	1.60826	22m	2	2	3
57.234	1.60826	m	1	6	2
57.4224	1.60343	13	0	4	3
58.8153	1.56873	6	4	3	1
59.08	1.56234	87m	2	7	0
59.08	1.56234	m	3	4	2
59.9211	1.5424	18m	3	6	0
59.9211	1.5424	m	2	3	3
60.0781	1.53875	13	4	4	0
60.8069	1.52204	11	0	8	0
61.4789	1.507	100m	4	0	2
61.4789	1.507	m	2	7	1
61.9419	1.49684	68m	4	1	2
61.9419	1.49684	m	2	6	2
62.2943	1.48922	24m	1	8	0
62.2943	1.48922	m	3	6	1
62.4988	1.48484	48	4	4	1
62.83	1.4778	6	3	0	3
63.2116	1.4698	39	0	8	1
63.3445	1.46703	28	3	1	3
63.5662	1.46245	9	2	4	3
63.6992	1.45972	10m	1	5	3
63.6992	1.45972	m	3	5	2
64.134	1.45087	3	1	7	2
64.699	1.43956	6m	1	8	1
64.699	1.43956	m	4	5	0
64.8737	1.4361	13	3	2	3
65.9761	1.41475	83m	4	3	2
65.9761	1.41475	m	0	0	4
66.5508	1.40392	26	3	7	0
66.7662	1.39991	15	2	8	0
67.0618	1.39446	42	4	5	1
67.3816	1.38862	13m	5	2	0
67.3816	1.38862	m	3	3	3
67.6692	1.38341	30	5	0	1
67.9264	1.3788	17	1	1	4
68.0915	1.37586	10	2	5	3
68.1642	1.37457	11	5	1	1
68.5114	1.36844	12	2	7	2
68.846	1.36261	2	3	7	1
69.058	1.35894	2	2	8	1
69.2821	1.35509	10m	1	6	3
69.2821	1.35509	m	3	6	2
69.4757	1.35179	6m	1	2	4
69.4757	1.35179	m	4	4	2
69.639	1.34902	2	5	2	1
69.8195	1.34597	4	5	3	0
70.1994	1.33962	21m	0	8	2
70.1994	1.33962	m	4	6	0
70.8182	1.32942	7m	3	4	3
70.8182	1.32942	m	1	9	0
71.5659	1.31736	6	1	8	2
71.7091	1.31508	4m	1	3	4
71.7091	1.31508	m	2	0	4
72.0661	1.30944	57	5	3	1
72.1915	1.30747	31	2	1	4
73.063	1.29401	17	1	9	1
73.2051	1.29185	11	5	4	0
73.4182	1.28863	18m	4	1	3
73.4182	1.28863	m	2	6	3
73.6308	1.28543	14	2	2	4
73.7958	1.28296	8m	0	4	4
73.7958	1.28296	m	3	8	0
74.8839	1.267	7m	4	2	3
74.8839	1.267	m	5	1	2
75.1829	1.2627	25m	1	4	4
75.1829	1.2627	m	3	5	3
75.4631	1.2587	19m	5	4	1
75.4631	1.2587	m	1	7	3
75.5393	1.25762	14	3	7	2
75.7433	1.25474	7	2	8	2
76.0647	1.25024	7m	2	3	4
76.0647	1.25024	m	3	8	1
76.3037	1.24692	7	5	2	2
76.4263	1.24522	3	4	7	0
77.2112	1.23451	4m	2	9	1
77.2112	1.23451	m	4	3	3
77.4725	1.231	5	5	5	0
78.6006	1.21613	20m	4	7	1
78.6006	1.21613	m	5	3	2
79.0166	1.21077	14m	4	6	2
79.0166	1.21077	m	3	1	4
79.2933	1.20724	9	2	4	4
79.4148	1.2057	17	1	5	4
79.5695	1.20374	42m	2	7	3
79.5695	1.20374	m	5	5	1
79.8457	1.20027	22	1	10	0
80.3	1.19462	8	3	6	3
80.4897	1.19228	41m	3	2	4
80.4897	1.19228	m	4	4	3
80.6438	1.19039	24m	0	10	1
80.6438	1.19039	m	6	0	0
81.1257	1.18453	16	0	8	3
81.847	1.17591	3m	3	9	0
81.847	1.17591	m	5	4	2
81.996	1.17415	2	1	10	1
82.55	1.16767	4m	3	8	2
82.55	1.16767	m	6	2	0
82.8073	1.16469	3	3	3	4
83.1665	1.16057	14	0	6	4
83.4169	1.15772	10m	2	5	4
83.4169	1.15772	m	4	8	0
83.6736	1.15482	4	2	9	2
83.8959	1.15233	6m	2	10	0
83.8959	1.15233	m	3	9	1
84.6471	1.14401	20m	4	5	3
84.6471	1.14401	m	5	6	1
84.9255	1.14097	17	6	3	0
85.2097	1.13789	17	5	0	3
85.55	1.13423	8	4	8	1
85.6698	1.13295	4	5	1	3
86.0325	1.1291	24m	5	5	2
86.0325	1.1291	m	3	4	4
86.3052	1.12623	13	3	7	3
87.0541	1.11846	7m	6	3	1
87.0541	1.11846	m	0	10	2
87.615	1.11274	1m	1	1	5
87.615	1.11274	m	0	2	5
88.051	1.10835	10m	4	0	4
88.051	1.10835	m	6	4	0
88.3913	1.10496	13	1	10	2
88.5266	1.10362	15m	2	6	4
88.5266	1.10362	m	5	7	0
89.3419	1.09565	35m	6	0	2
89.3419	1.09565	m	5	3	3
89.5287	1.09385	20m	4	6	3
89.5287	1.09385	m	1	11	0
89.7556	1.09167	8	6	1	2
