# Supplementary material for: Ag/YBCO superconducting round wires fabricated by bimaterial 3D printing
Source: Research Square preprint supplement (doi:10.21203/rs.3.rs-7301425/v1), 2025-08-21
Supplement: Supplementary file 3 [file 914861a32f9b960022de735b.xlsx]

## Sheet: Sheet1
YBa2Cu3O7-δ (PDF Card - 00-038-1433)
2θ	d(Å)	I	h	k	l
7.5568	11.689	<1	0	1	0
15.1686	5.83612	4	0	2	0
22.8344	3.89125	10	0	3	0
23.2734	3.81884	4	0	0	1
27.5533	3.2346	3	1	2	0
27.8923	3.19605	5	0	2	1
30.6172	2.91753	<1	0	4	0
32.5372	2.74962	55	1	3	0
32.8412	2.72486	100m	0	3	1
33.7562	2.65306	2	1	1	1
36.369	2.46823	3	1	2	1
38.511	2.33573	13m	0	5	0
38.798	2.31911	5	0	4	1
40.3829	2.23167	14	1	3	1
45.5228	1.99093	2m	1	4	1
46.6319	1.94613	22	0	6	0
46.7237	1.94252	21	2	0	0
47.5789	1.90958	12	0	0	2
51.4938	1.77322	4	1	5	1
52.5246	1.74082	3	1	6	0
52.7317	1.73447	4	0	6	1
53.3986	1.71437	2	0	3	2
54.9954	1.66831	2	0	7	0
55.3115	1.65952	1	2	2	1
58.2056	1.58371	26	1	6	1
58.8244	1.56851	13	1	3	2
60.3072	1.53344	<1	1	7	0
60.4923	1.52919	1	0	7	1
62.0783	1.49388	2	2	5	0
62.2605	1.48995	2	2	4	1
62.8076	1.47828	3	0	5	2
65.5693	1.42254	2	1	7	1
68.1321	1.37514	5	2	6	0
68.6163	1.36661	5	1	8	0
68.795	1.36349	13m	0	8	1
68.8867	1.3619	12	2	0	2
72.8184	1.29776	1	0	9	0
72.9931	1.29508	<1	3	0	0
73.5586	1.28651	2m	1	6	2
74.9744	1.26569	<1	2	7	0
75.6132	1.25658	1	0	7	2
77.2445	1.23406	<1	2	4	2
77.4776	1.23093	4	1	9	0
77.6518	1.2286	6	0	9	1
77.8243	1.22631	5	3	0	1
79.0854	1.20989	5m	0	3	3
79.7466	1.20151	3	2	7	1
81.1383	1.18438	1	1	2	3
81.8098	1.17635	2	2	5	2
82.3323	1.1702	<1	3	3	1
82.4956	1.1683	1	0	10	0
83.6473	1.15512	1	1	3	3
87.0248	1.11876	3	1	10	0
87.2844	1.1161	6m	2	8	1
87.7456	1.11142	4	1	8	2
90.3474	1.08605	1	3	5	1
91.086	1.07916	1	2	9	0
91.7191	1.07336	1m	0	9	2
93.0237	1.0617	1	0	11	0
93.7829	1.05509	1	2	7	2
95.8495	1.03774	4	3	6	1
96.3904	1.03335	4	3	3	2
97.1416	1.02735	4	1	6	3
