# Supplementary material for: Ag/YBCO superconducting round wires fabricated by bimaterial 3D printing
Source: Research Square preprint supplement (doi:10.21203/rs.3.rs-7301425/v1), 2025-08-21
Supplement: Supplementary file 4 [file f70f5643fef5bcac4c313a92.xlsx]

## Sheet: Sheet1
YBa2AgxCu3-xO7-δ (PDF Card - 04-006-3247)
2θ	d(Å)	I	h	k	l
7.5562	11.69	20	0	0	1
15.1455	5.845	22	0	0	2
22.8181	3.894	102m	0	0	3
22.8181	3.894	m	0	1	0
23.2169	3.828	33	1	0	0
24.0686	3.69443	4	0	1	1
24.4483	3.63792	2	1	0	1
27.5005	3.24069	29	0	1	2
27.8364	3.20235	52	1	0	2
30.5639	2.9225	4	0	0	4
32.4789	2.75442	474	0	1	3
32.7682	2.73076	999m	1	1	0
32.7682	2.73076	m	1	0	3
33.6874	2.65832	12	1	1	1
36.2906	2.47338	24	1	1	2
38.4721	2.338	88m	0	0	5
38.4721	2.338	m	0	1	4
38.732	2.32291	23	1	0	4
40.3053	2.23579	131	1	1	3
45.1987	2.00445	4	0	1	5
45.4267	1.99492	6m	1	0	5
45.4267	1.99492	m	1	1	4
46.6098	1.947	188m	0	0	6
46.6098	1.947	m	0	2	0
47.4623	1.914	128	2	0	0
48.1339	1.88885	1	2	0	1
49.2902	1.84721	2	0	2	2
50.1081	1.81896	2	2	0	2
51.4153	1.77574	28	1	1	5
52.4963	1.74169	17m	0	1	6
52.4963	1.74169	m	0	2	3
52.7006	1.73542	15m	1	0	6
52.7006	1.73542	m	1	2	0
53.2862	1.71772	18m	2	1	0
53.2862	1.71772	m	1	2	1
53.9044	1.69947	1	2	1	1
54.935	1.67	9	0	0	7
55.1629	1.66364	12	1	2	2
55.7306	1.64803	7	2	1	2
56.7684	1.62034	1	0	2	4
57.5112	1.60117	2	2	0	4
58.1409	1.58531	253m	1	1	6
58.1409	1.58531	m	1	2	3
58.6904	1.57178	126	2	1	3
60.2482	1.53481	4	0	1	7
60.4276	1.53068	6	1	0	7
61.974	1.49615	19	0	2	5
62.1573	1.49217	17	1	2	4
62.6781	1.48102	28m	2	1	4
62.6781	1.48102	m	2	0	5
63.6247	1.46125	1	0	0	8
65.4639	1.42457	12	1	1	7
67.1146	1.39349	1	1	2	5
67.6211	1.38428	3	2	1	5
68.0152	1.37721	35	0	2	6
68.5309	1.3681	18	0	1	8
68.7131	1.36492	106m	1	0	8
68.7131	1.36492	m	2	2	0
70.8342	1.32916	1	2	2	2
72.7444	1.29889	3m	0	0	9
72.7444	1.29889	m	0	3	0
72.9398	1.29589	6	1	2	6
73.448	1.28818	15m	1	1	8
73.448	1.28818	m	2	2	3
74.2662	1.276	1	3	0	0
74.8426	1.26759	6m	0	2	7
74.8426	1.26759	m	0	3	2
75.4883	1.25835	5	2	0	7
76.3237	1.24664	2	3	0	2
77.4364	1.23148	28m	0	1	9
77.4364	1.23148	m	0	3	3
77.6031	1.22925	36m	1	0	9
77.6031	1.22925	m	1	3	0
78.1119	1.22251	1	1	3	1
78.8774	1.21256	44m	3	0	3
78.8774	1.21256	m	3	1	0
79.6022	1.20333	5m	1	2	7
79.6022	1.20333	m	1	3	2
80.0772	1.19738	2	2	1	7
80.8988	1.18728	2	3	1	2
80.983	1.18626	2	0	3	4
81.6075	1.17875	12	2	2	5
82.1524	1.17231	12m	1	1	9
82.1524	1.17231	m	1	3	3
82.4354	1.169	8m	0	2	8
82.4354	1.169	m	0	0	10
83.0886	1.16146	1	2	0	8
83.41	1.1578	10	3	1	3
85.4933	1.13484	1	0	3	5
85.656	1.1331	1	1	3	4
86.9395	1.11964	10m	3	1	4
86.9395	1.11964	m	0	1	10
87.1096	1.11789	45m	2	2	6
87.1096	1.11789	m	1	2	8
87.5892	1.113	11	2	1	8
90.1383	1.08803	4	1	3	5
90.9404	1.08051	3m	0	2	9
90.9404	1.08051	m	0	3	6
91.385	1.07641	4	3	1	5
91.5816	1.07461	6m	1	1	10
91.5816	1.07461	m	2	3	0
92.1173	1.06976	1	2	3	1
92.3992	1.06723	3m	3	0	6
92.3992	1.06723	m	3	2	0
92.9063	1.06273	3m	3	2	1
92.9063	1.06273	m	0	0	11
93.5806	1.05684	6m	2	2	7
93.5806	1.05684	m	2	3	2
94.3937	1.04987	2	3	2	2
95.6192	1.03963	27m	1	3	6
95.6192	1.03963	m	1	2	9
96.1085	1.03563	27m	2	1	9
96.1085	1.03563	m	2	3	3
96.8935	1.02932	40m	3	1	6
96.8935	1.02932	m	3	2	3
98.8776	1.01391	1	3	0	7
99.6242	1.00831	2	2	3	4
100.45	1.00223	3m	3	2	4
100.45	1.00223	m	0	2	10
101.086	0.997641	2m	2	0	10
101.086	0.997641	m	2	2	8
102.119	0.990329	8m	1	3	7
102.119	0.990329	m	1	1	11
103.449	0.981195	3	3	1	7
104.202	0.976155	1	2	3	5
104.604	0.9735	7m	0	0	12
104.604	0.9735	m	0	4	0
105.008	0.970864	5	3	2	5
105.075	0.97043	5m	0	3	8
105.075	0.97043	m	0	4	1
105.211	0.969548	8	1	2	10
105.696	0.966428	9	2	1	10
106.533	0.961133	3	3	0	8
107.199	0.957	7	4	0	0
109.287	0.944472	2m	1	0	12
109.287	0.944472	m	0	4	3
109.459	0.943469	2	1	4	0
109.897	0.940931	6m	2	2	9
109.897	0.940931	m	1	3	8
110.761	0.936005	2	3	2	6
111.331	0.932817	5m	3	1	8
111.331	0.932817	m	0	2	11
111.584	0.931413	2	1	4	2
112.002	0.929116	7m	4	1	0
112.002	0.929116	m	2	0	11
112.497	0.926423	3	4	1	1
113.022	0.923606	1	0	4	4
114.285	0.916974	17m	1	4	3
114.285	0.916974	m	1	1	12
115.668	0.909947	10m	3	3	0
115.668	0.909947	m	4	0	4
116.222	0.907202	5	3	3	1
116.406	0.906296	1	1	2	11
116.879	0.903991	14m	4	1	3
116.879	0.903991	m	2	3	7
117.985	0.898706	4m	3	3	2
117.985	0.898706	m	0	4	5
118.169	0.897842	1	1	4	4
119.254	0.892817	1	1	3	9
120.353	0.88787	3	2	2	10
120.751	0.886107	7m	3	3	3
120.751	0.886107	m	4	1	4
123.078	0.876172	3	0	1	13
123.264	0.875402	4m	1	0	13
123.264	0.875402	m	1	4	5
124.385	0.870844	6m	0	2	12
124.385	0.870844	m	0	4	6
124.938	0.868645	7m	3	3	4
124.938	0.868645	m	0	3	10
125.175	0.867712	11m	2	0	12
125.175	0.867712	m	2	4	0
125.733	0.865536	10m	2	4	1
125.733	0.865536	m	2	3	8
126.231	0.863619	3	4	1	5
126.699	0.861842	8m	3	0	10
126.699	0.861842	m	3	2	8
127.498	0.858858	15m	4	0	6
127.498	0.858858	m	4	2	0
128.128	0.85655	8	4	2	1
128.812	0.854086	8	1	1	13
130.221	0.849148	2m	1	2	12
130.221	0.849148	m	1	4	6
130.56	0.847986	2	3	3	5
130.861	0.846967	5m	2	4	3
130.861	0.846967	m	1	3	10
132.488	0.841586	2	3	1	10
132.66	0.841035	2	0	4	7
133.446	0.838532	9m	4	2	3
133.446	0.838532	m	2	2	11
136.153	0.830327	1	4	0	7
137.023	0.827821	5	2	3	9
138.225	0.824461	15m	3	3	6
138.225	0.824461	m	4	2	4
139.029	0.82228	8	0	3	11
139.343	0.821443	2	1	4	7
141.283	0.81644	5m	0	2	13
141.283	0.81644	m	0	1	14
141.533	0.815817	3	1	0	14
